# Supplementary material for: Core-modified 48π and 42π decaphyrins: syntheses, properties and structures
Source: Royal Society of Chemistry journal article supplement (doi:10.1039/c9qo01162e), 2019-01-01
Supplement: c9qo01162e1.pdf [file c9qo01162e1.pdf]

Supporting Information  
for  
**Core-modified 48 $\pi$  and 42 $\pi$  Decaphyrins: Syntheses, properties  
and structure**

Arindam Ghosh,<sup>[a]</sup>‡Syamasrit Dash,<sup>[a]</sup>‡A. Srinivasan,<sup>[a]</sup> C. H. Suresh,<sup>[b]</sup> S.  
Peruncheralathanan,<sup>[a]</sup> and Tavarekere K.Chandrashekar<sup>\*[a]</sup>

<sup>[a]</sup>School of Chemical Sciences, National Institute of Science Education and Research (NISER),  
Bhubaneswar-752050, Odisha, HBNI, India.

E-mail: tkc@niser.ac.in,

‡Both the author contributing equally

Table of Contents:

|                                                                           |       |
|---------------------------------------------------------------------------|-------|
| 1. Introduction:                                                          | 2     |
| 2. Mass spectral analysis of <b>10</b> :                                  | 3     |
| 3. Single crystal X-ray structure analysis of <b>10</b> :                 | 4-8   |
| 4. NMR spectral analysis of <b>10</b> , <b>10.4H<sup>+</sup></b> :        | 9-13  |
| 5. DFT Calculations of <b>10</b> :                                        | 14    |
| 6. DFT Calculations of <b>10.4H<sup>+</sup></b> :                         | 15-16 |
| 7. Electronic spectral analysis of <b>10</b> , <b>10.4H<sup>+</sup></b> : | 17    |
| 8. Mass spectral analysis of <b>13</b> and <b>12</b> :                    | 18-19 |
| 9. Electronic spectral analysis of <b>12</b> , <b>12.2H<sup>+</sup></b> : | 20    |
| 10. Mechanism for the formation of <b>13</b> and <b>12</b> :              | 21    |
| 11. NMR spectral analysis of <b>12</b> , <b>12.2H<sup>+</sup></b> :       | 22-25 |
| 12. DFT Calculations of <b>12</b> and <b>12.4H<sup>+</sup></b> :          | 26-27 |
| 13. NMR spectral analysis of <b>13</b> and <b>13.2H<sup>+</sup></b> :     | 28-29 |
| 14. Single crystal X-ray structure analysis of <b>13</b> :                | 30-32 |

### **General Information:**

The solvents required for the synthesis, such as Tetrahydrofuran, Dichloromethane, n-Hexane were purified by using standard procedure. Deuterated NMR solvent ( $\text{CD}_2\text{Cl}_2$ ) was used as received. All NMR spectra were recorded with Bruker 400 MHz spectrometer in solvent  $\text{CD}_2\text{Cl}_2$  using tetramethylsilane (TMS) as an internal standard. Chemical shifts are expressed in parts per million (ppm) units relative to TMS. Electron spray ionization (ESI) mass spectra were recorded on Bruker, micrOTOF-QII mass spectrometer. Electronic spectra were recorded with Perkin Elmer – Lambda 750 UV – winlab software package. X-ray quality crystals for the compounds were grown by the slow diffusion of acetonitrile over  $\text{CHCl}_3$  solution and  $\text{CHCl}_3$  over hexane. Single crystal X-ray diffraction data were collected on a Rigaku Oxford Diffraction, 2018, four-circle diffractometer and SuperNova, Dual, Cu at home/near.

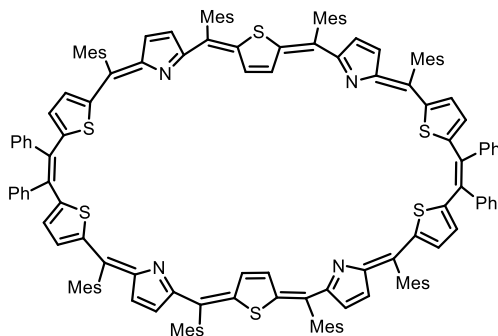

### Display Report

|                      |                                                    |                        |
|----------------------|----------------------------------------------------|------------------------|
| <b>Analysis Info</b> | Acquisition Date                                   | 11/15/2018 10:55:38 AM |
| Analysis Name        | D:\Data\NOV-2018\TKC\15112018_TKC_AVA_PENTA_DECA.d |                        |
| Method               | pos tune high.m                                    | Operator               |
| Sample Name          |                                                    | Amit S.Sahu            |
| Comment              |                                                    | Instrument             |
|                      |                                                    | micrOTOF-Q II 10337    |

#### Acquisition Parameter

|             |            |                       |            |                  |           |
|-------------|------------|-----------------------|------------|------------------|-----------|
| Source Type | ESI        | Ion Polarity          | Positive   | Set Nebulizer    | 0.4 Bar   |
| Focus       | Not active | Set Capillary         | 4500 V     | Set Dry Heater   | 180 °C    |
| Scan Begin  | 50 m/z     | Set End Plate Offset  | -500 V     | Set Dry Gas      | 4.0 l/min |
| Scan End    | 3000 m/z   | Set Collision Cell RF | 1600.0 Vpp | Set Divert Valve | Waste     |

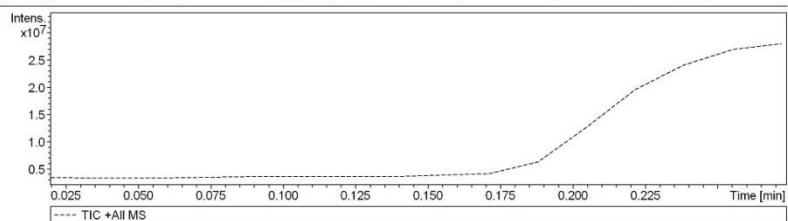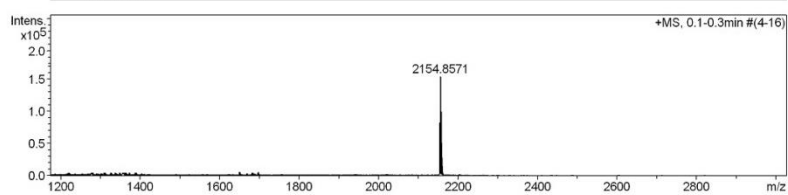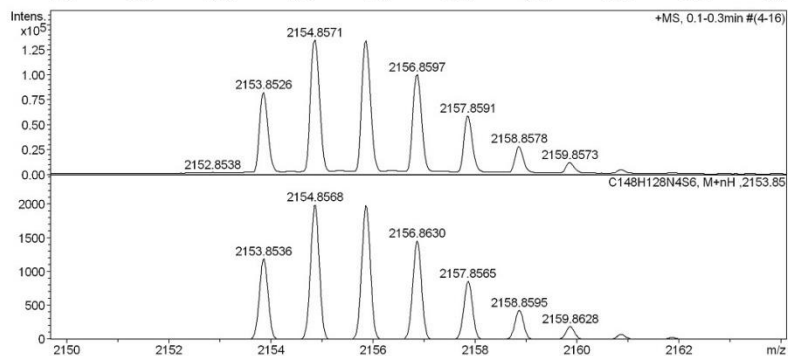

**Figure S1:** HRMS spectrum of **10**

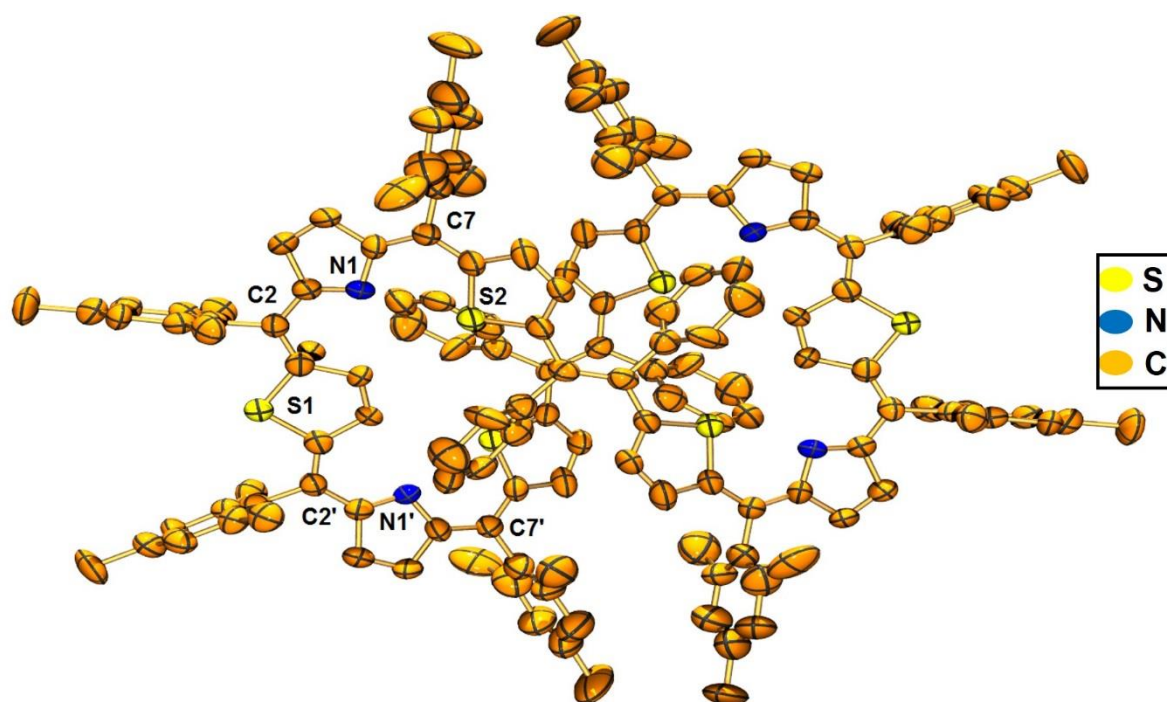

**Figure S2:** Crystal structure of **10** (Hydrogen atoms are omitted for clarity). Thermal ellipsoids are drawn at 50% probability.

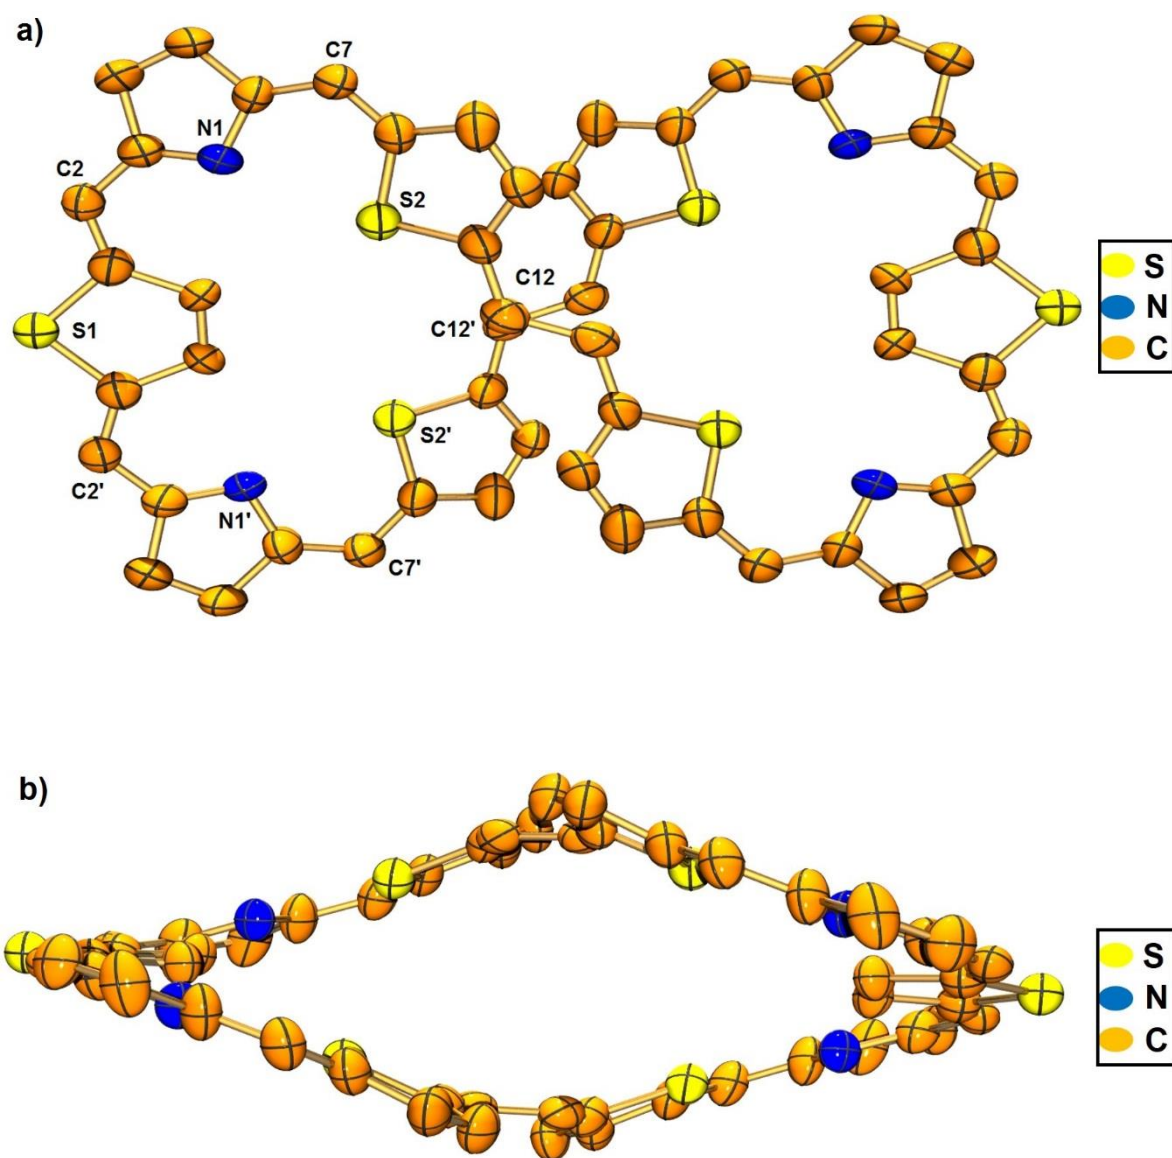

**Figure S3:** Crystal structure of **10** (a) Top view and (b) side view (*Meso* substituents and hydrogen atoms are omitted for clarity)

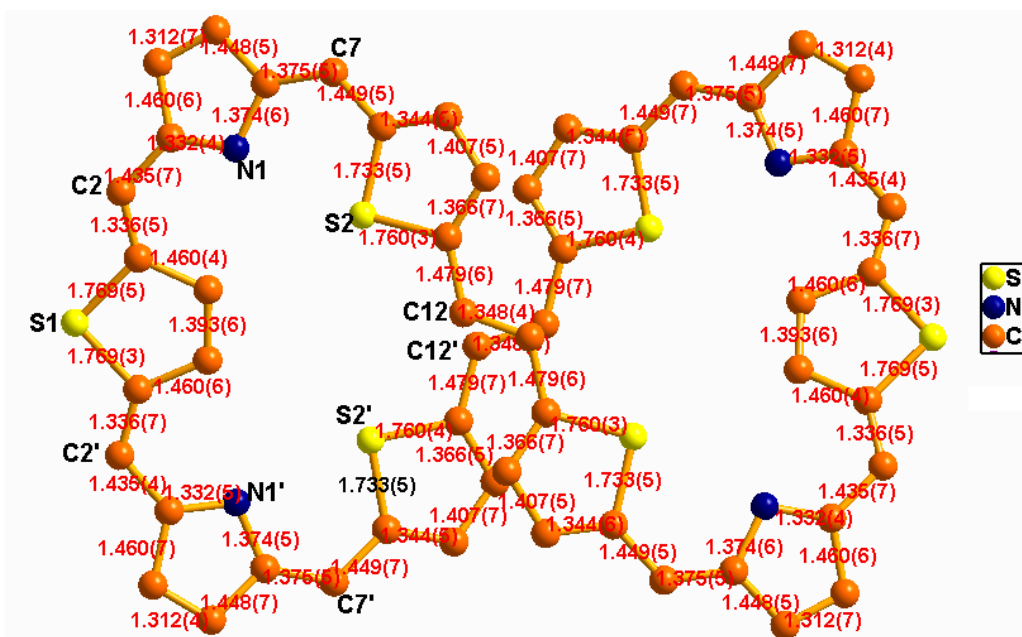

**Figure S4:** Bond length of **10**

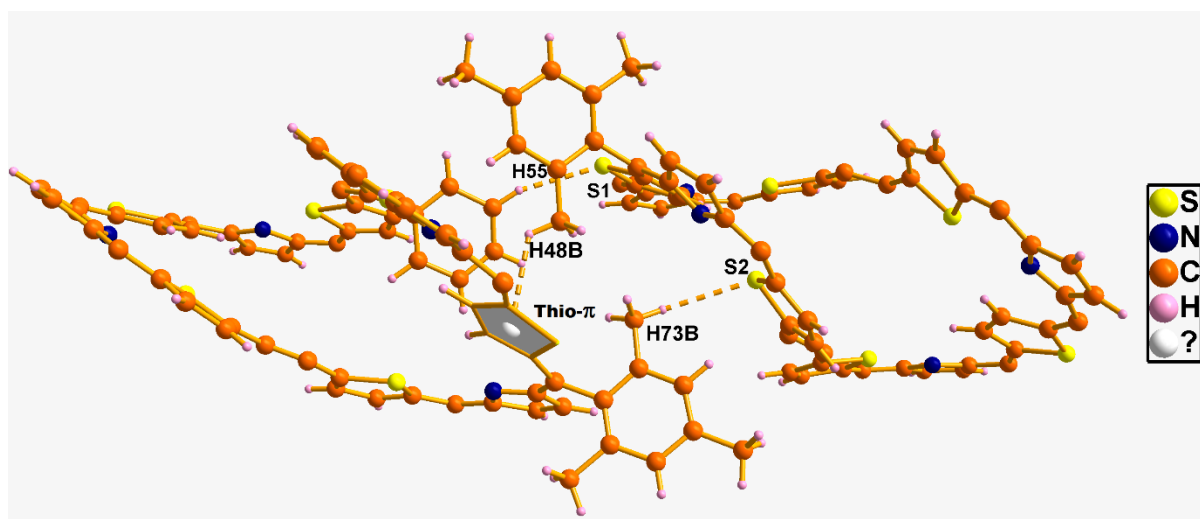

**Figure S5:** Self-assembled dimer of **10** (a) The CH... $\pi$  interaction generated between thiophene  $\pi$  electron cloud and C48-H48 (b) Intermolecular molecular hydrogen bonding between (i) S2...H73-C73 and (ii) S1...H55-C55.

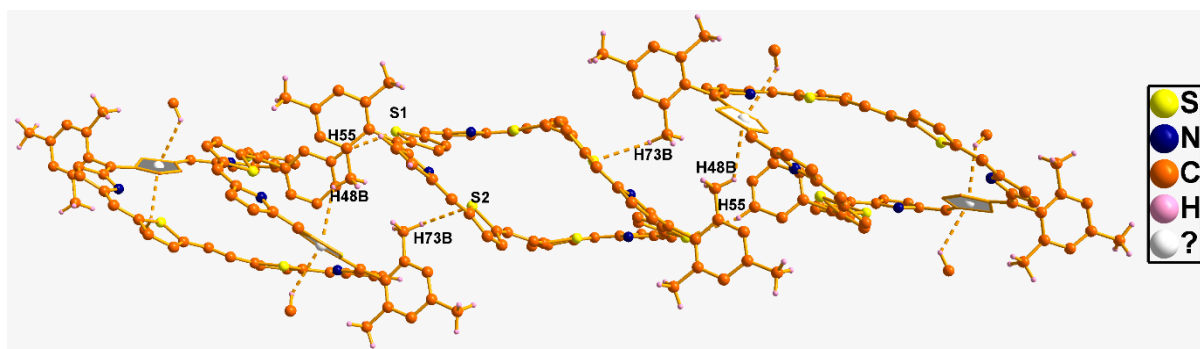

*Figure S6:* One dimensional array structure of **10**

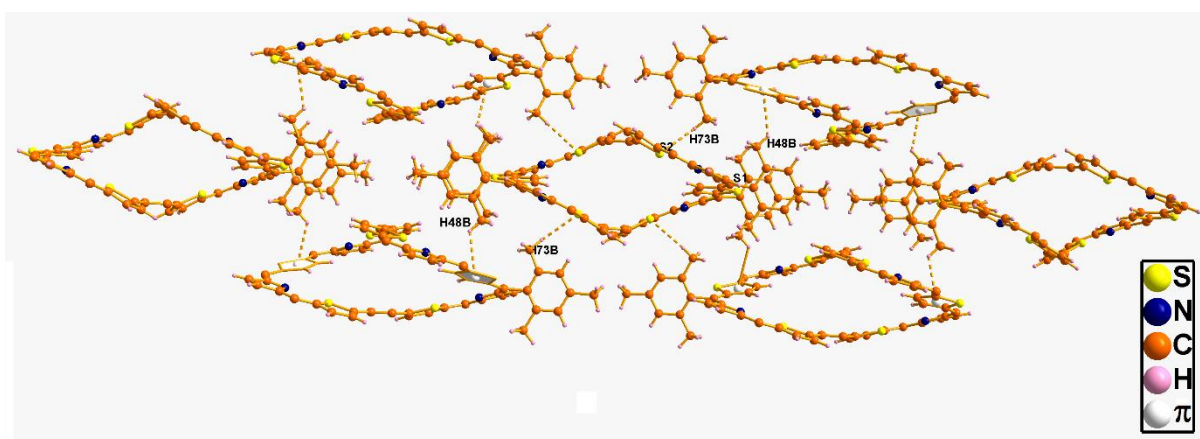

*Figure S7:* two dimensional arrays of **10**.

**Table S1:** Crystal data for **10**

| Table 1. Crystal data and structure refinement for tkc_Decaphyrin_Final. |                                                                       |
|--------------------------------------------------------------------------|-----------------------------------------------------------------------|
| Identification code                                                      | tkc_Decaphyrin_Final                                                  |
| Empirical formula                                                        | C <sub>44.4</sub> H <sub>38.4</sub> N <sub>1.2</sub> S <sub>1.8</sub> |
| Formula weight                                                           | 646.47                                                                |
| Temperature/K                                                            | 100.0                                                                 |
| Crystal system                                                           | hexagonal                                                             |
| Space group                                                              | P6 <sub>2</sub> 22                                                    |
| a/Å                                                                      | 28.8585(6)                                                            |
| b/Å                                                                      | 28.8585(6)                                                            |
| c/Å                                                                      | 37.6170(4)                                                            |
| $\alpha$ /°                                                              | 90                                                                    |
| $\beta$ /°                                                               | 90                                                                    |
| $\gamma$ /°                                                              | 120                                                                   |
| Volume/Å <sup>3</sup>                                                    | 27130.8(12)                                                           |
| Z                                                                        | 20                                                                    |
| $\rho_{\text{calc}}$ /cm <sup>3</sup>                                    | 0.791                                                                 |
| $\mu$ /mm <sup>-1</sup>                                                  | 0.971                                                                 |
| F(000)                                                                   | 6840.0                                                                |
| Crystal size/mm <sup>3</sup>                                             | 0.2 × 0.15 × 0.12                                                     |
| Radiation                                                                | CuK $\alpha$ ( $\lambda$ = 1.54184)                                   |
| 2 $\Theta$ range for data collection/°                                   | 5.88 to 154.814                                                       |
| Index ranges                                                             | -31 ≤ h ≤ 31, -17 ≤ k ≤ 18, -46 ≤ l ≤ 46                              |
| Reflections collected                                                    | 18453                                                                 |
| Independent reflections                                                  | 18452 [R <sub>int</sub> = 0.0000, R <sub>sigma</sub> = 0.0636]        |
| Data/restraints/parameters                                               | 18452/0/725                                                           |
| Goodness-of-fit on F <sup>2</sup>                                        | 0.911                                                                 |
| Final R indexes [I >= 2 $\sigma$ (I)]                                    | R <sub>1</sub> = 0.0421, wR <sub>2</sub> = 0.0947                     |
| Final R indexes [all data]                                               | R <sub>1</sub> = 0.0697, wR <sub>2</sub> = 0.1041                     |
| Largest diff. peak/hole / e Å <sup>-3</sup>                              | 0.18/-0.15                                                            |
| Flack parameter                                                          | 0.037(8)                                                              |



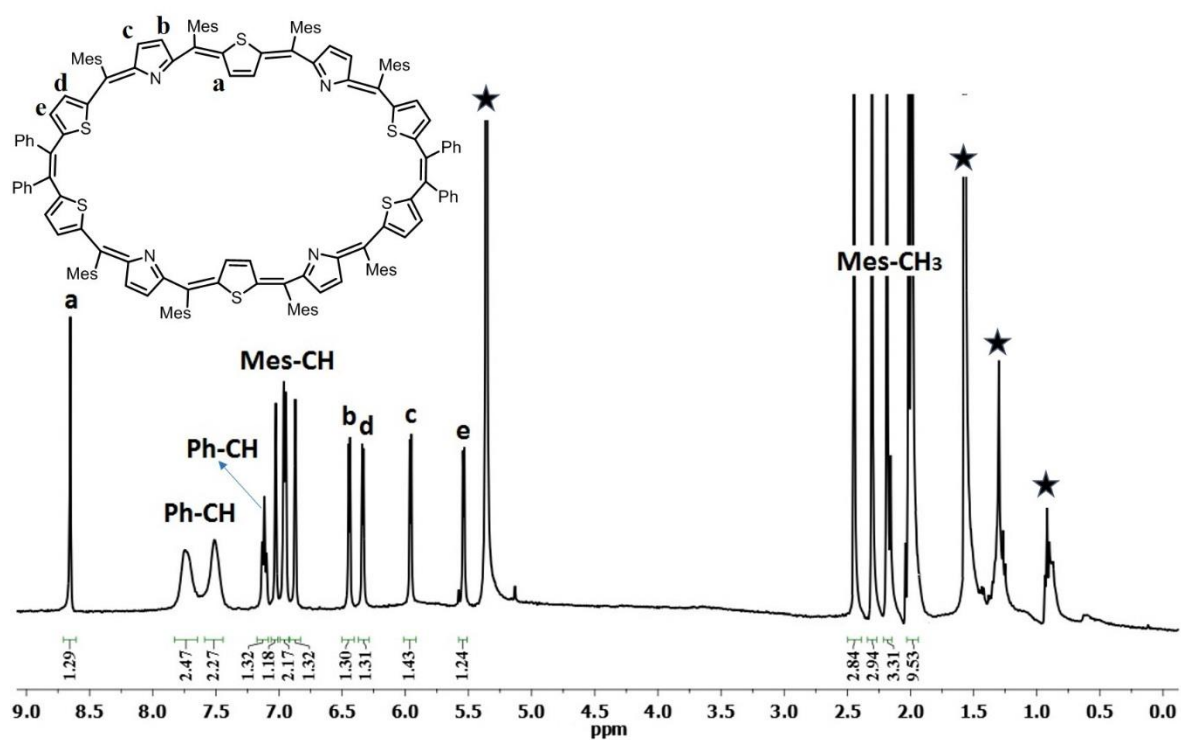

**Figure S8:**  $^1\text{H}$  NMR spectrum of **10** in  $\text{CD}_2\text{Cl}_2$

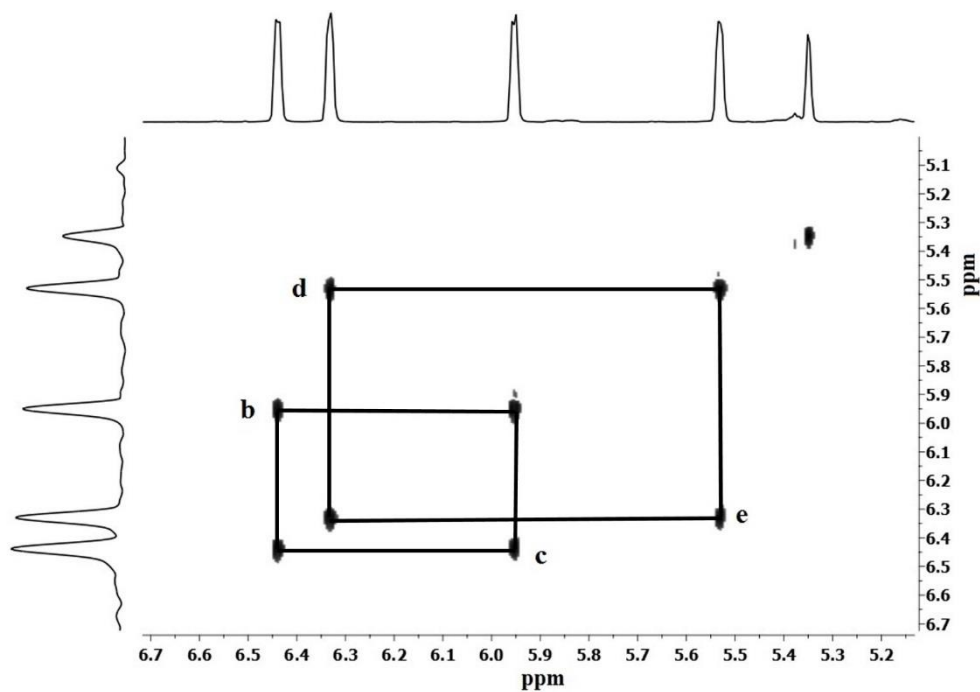

**Figure S9:**  $^1\text{H}$ - $^1\text{H}$  COSY spectrum of **10** with correlation in pyrrole and thiophene rings as part of the ethene bridge.

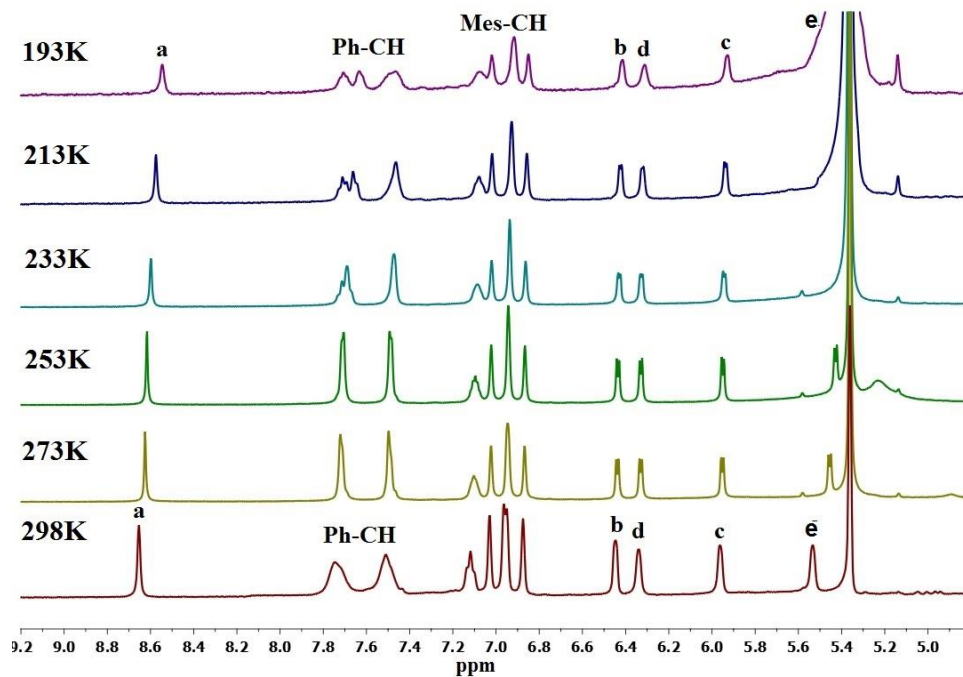

**Figure S10:** Low temperature  $^1\text{H}$  NMR spectrum of **10** in  $\text{CD}_2\text{Cl}_2$  (Aromatic region)

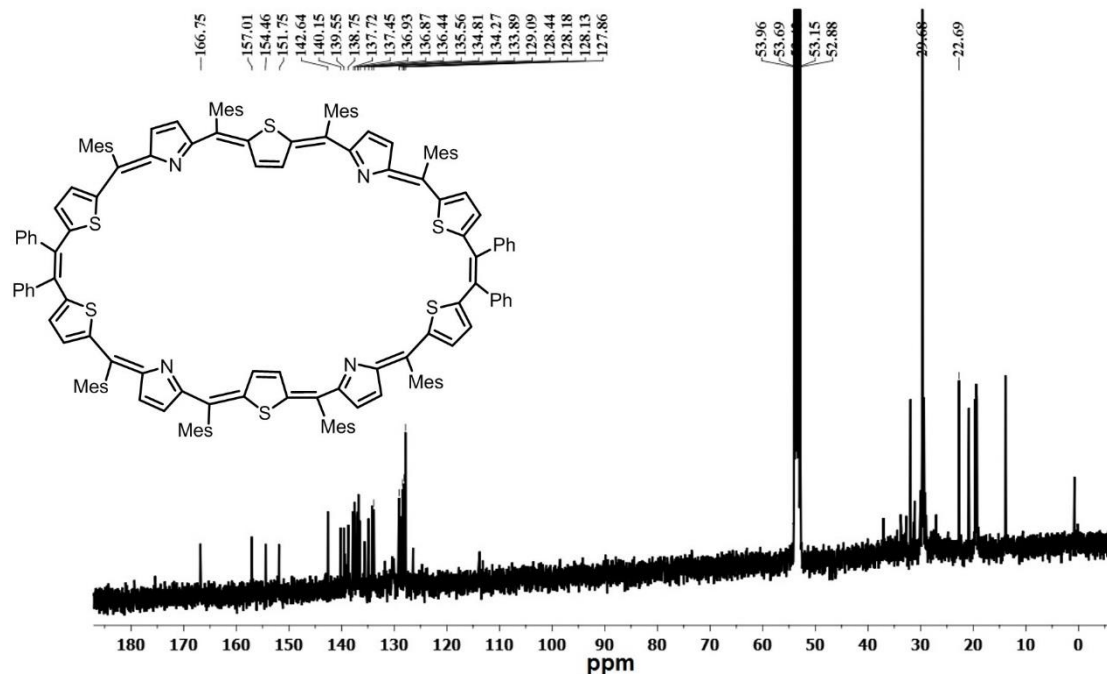

**Figure S11:**  $^{13}\text{C}$  NMR spectrum of **10** in  $\text{CD}_2\text{Cl}_2$

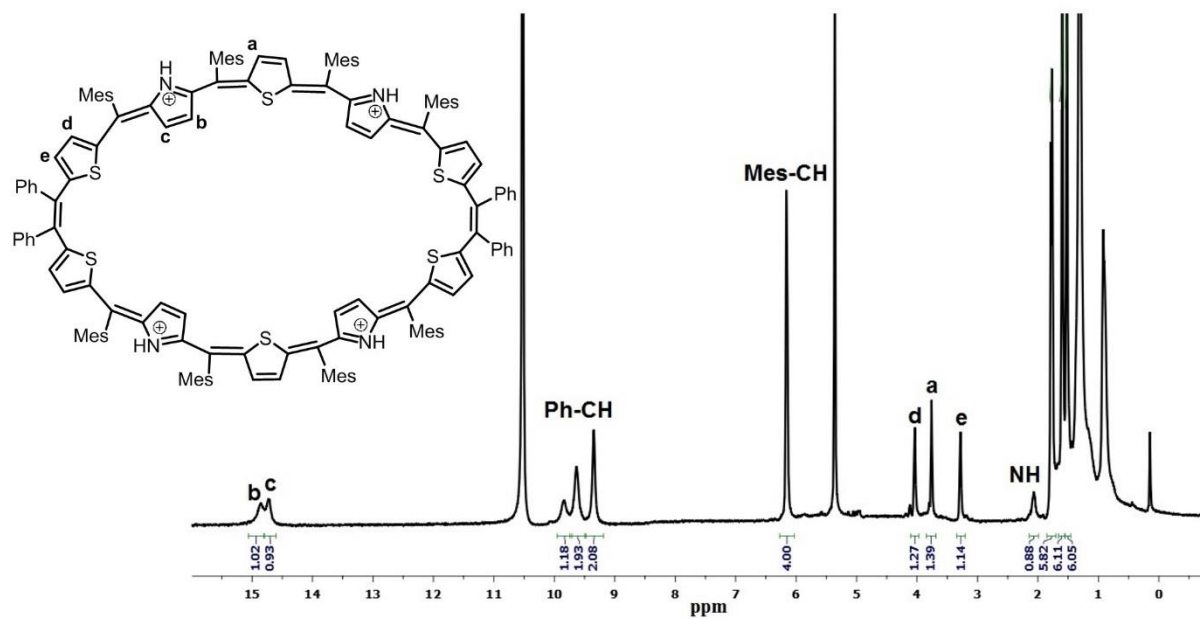

**Figure S12:** <sup>1</sup>H NMR spectrum of **10.4H<sup>+</sup>** in CD<sub>2</sub>Cl<sub>2</sub>

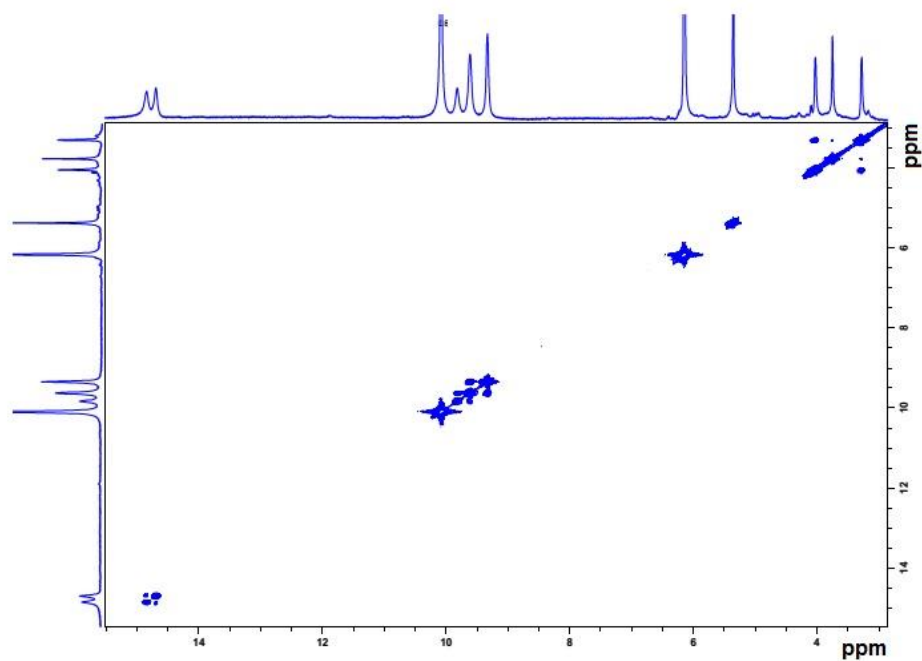

**Figure S13:** <sup>1</sup>H-<sup>1</sup>H COSY spectrum of **10.4H<sup>+</sup>** with correlation in pyrrole and thiophene rings as part of the ethene bridge

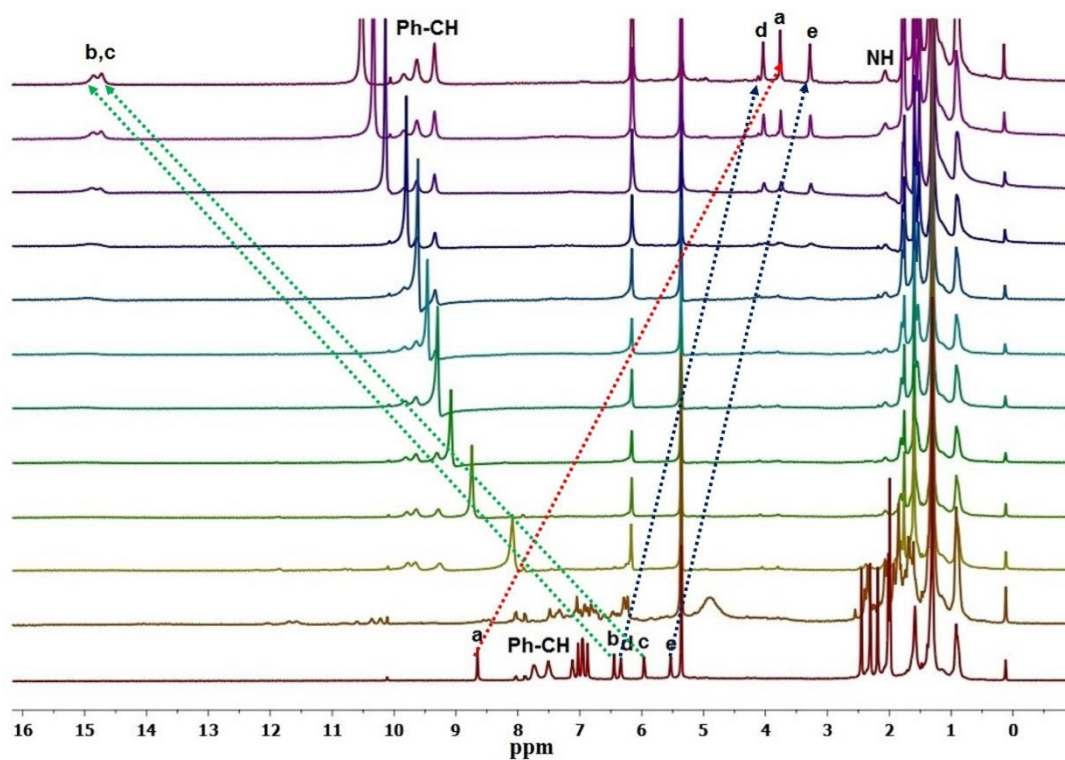

Figure S14:  $^1\text{H}$  NMR titration experiment of **10** with dilute solution of TFA in  $\text{CD}_2\text{Cl}_2$

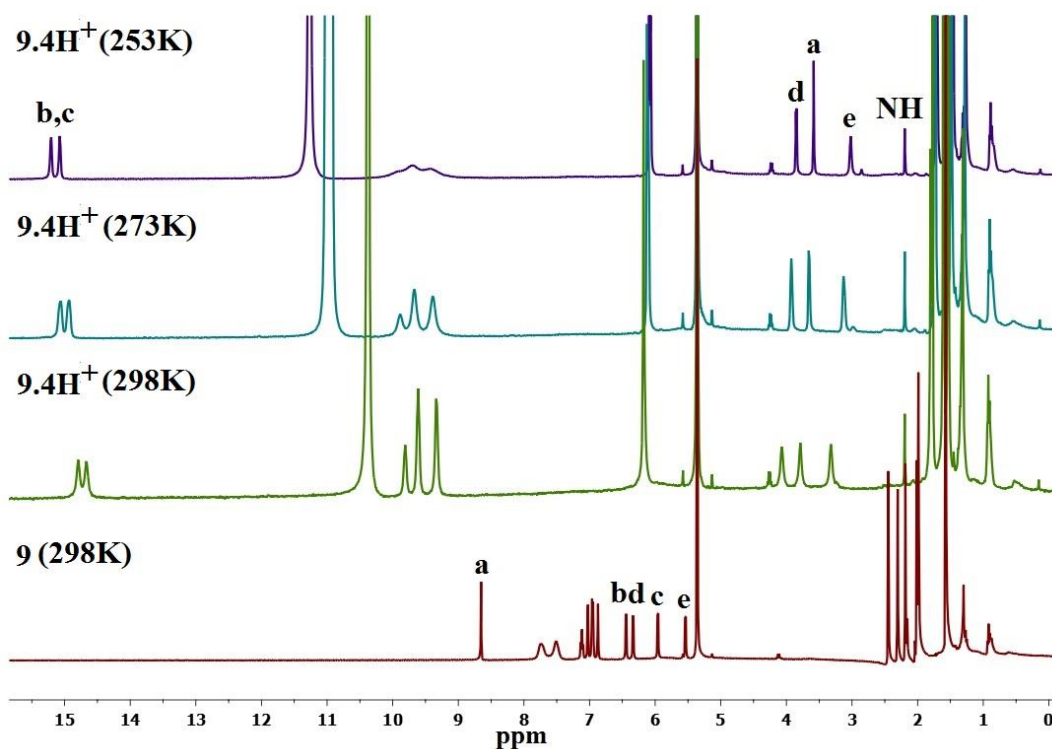

Figure S15: Low temperature  $^1\text{H}$  NMR spectrum of **10.4H<sup>+</sup>** in  $\text{CD}_2\text{Cl}_2$  (Full)

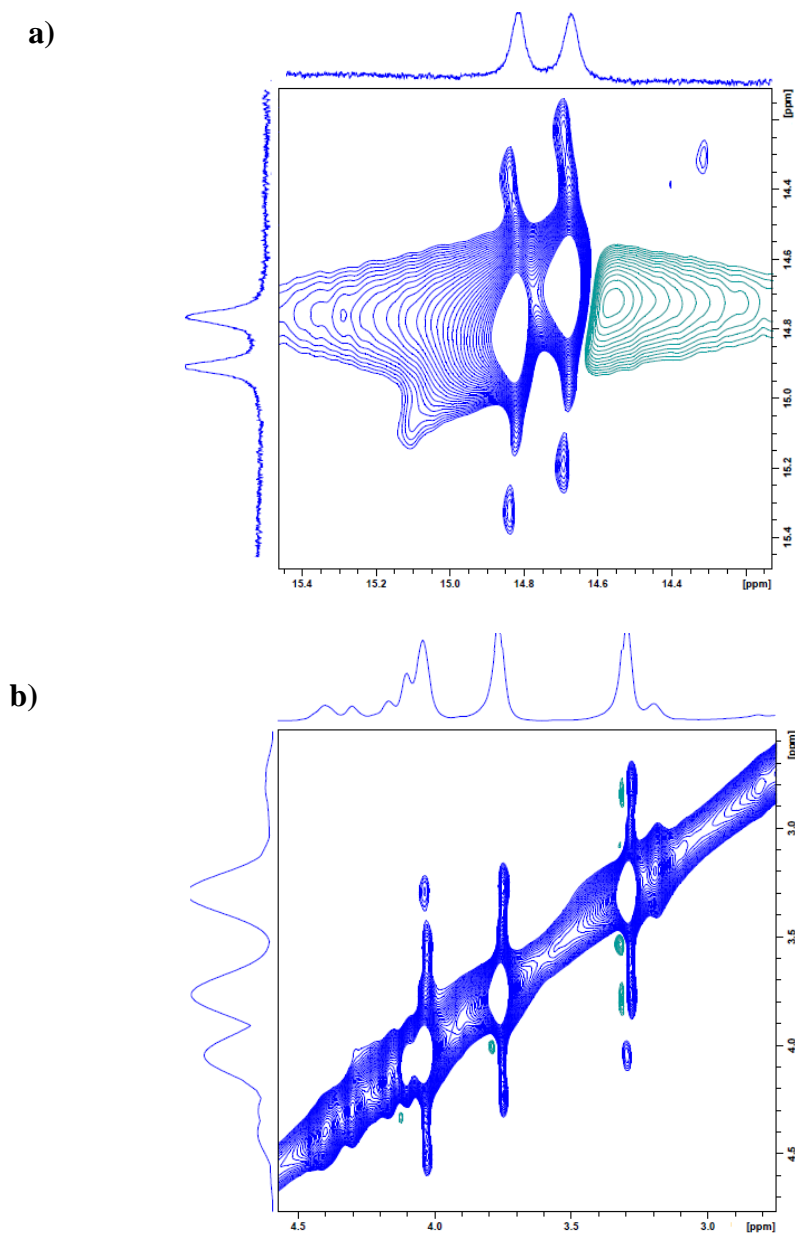

*Figure S16:* 2D NMR NOESY spectrum of  $10.4\text{H}^+$  in  $\text{CD}_2\text{Cl}_2$

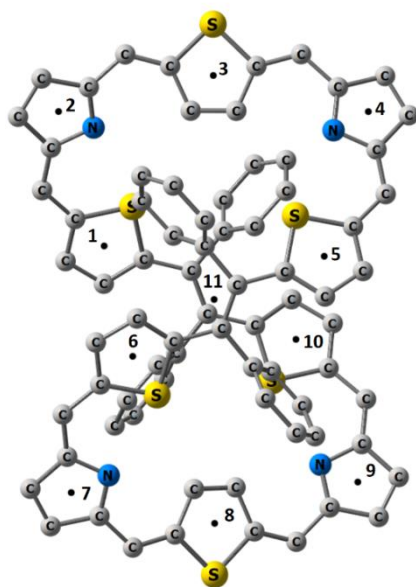

**Figure S17:** Optimized structure of **10** without meso groups at M062X/6-31G\*\* level of DFT

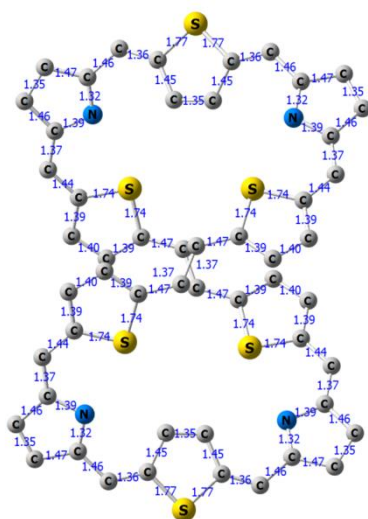

**Figure S18:** Bond length parameters in Å for **10** at M062X/6-31G\*\* level of DFT. Mesityl groups and Hydrogen atoms are omitted for clarity.

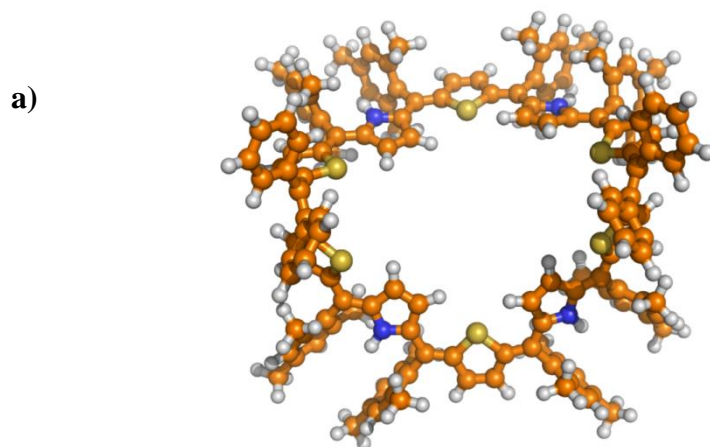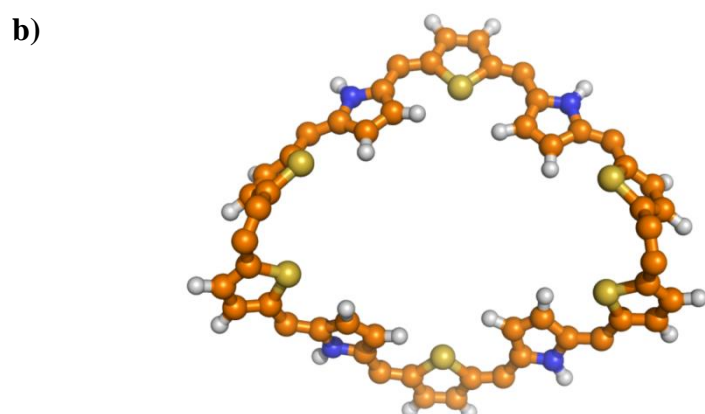

**Figure S19:** Optimized structure of **10.4H<sup>+</sup>** (a) with meso groups (b) without meso groups  
at M062X/6-31G\*\* level of DFT

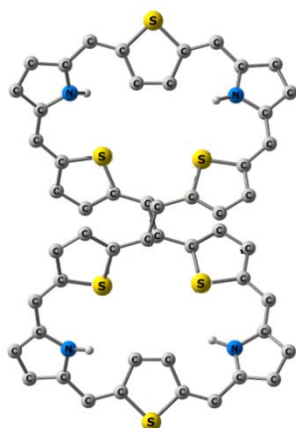

**A**

**E = -8323.828790 a.u.**

**Relative E = 16.7 kcal/mol**

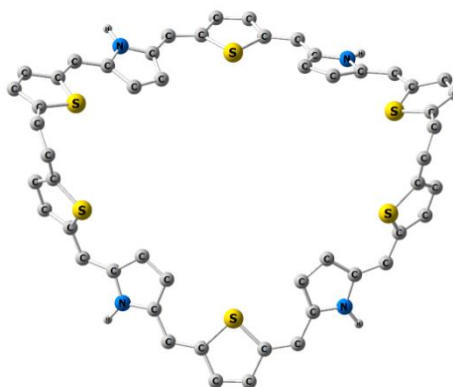

**B**

**E = -8323.855464 a.u.**

**0.0 kcal/mol**

**Figure S20:** Energy and relative energy of the two configurations of **10.4H<sup>+</sup>** at M062X/6-31G\*\* level of DFT. Mesityl groups, phenyl groups and the H atoms are omitted for clarity.

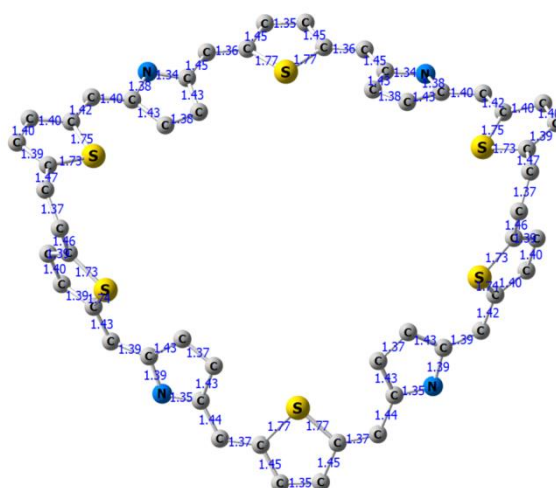

**Figure S21:** Bond length parameters in Å for **10.4H<sup>+</sup>** at M062X/6-31G\*\* level of DFT.

Mesityl groups and Hydrogen atoms are omitted for clarity.



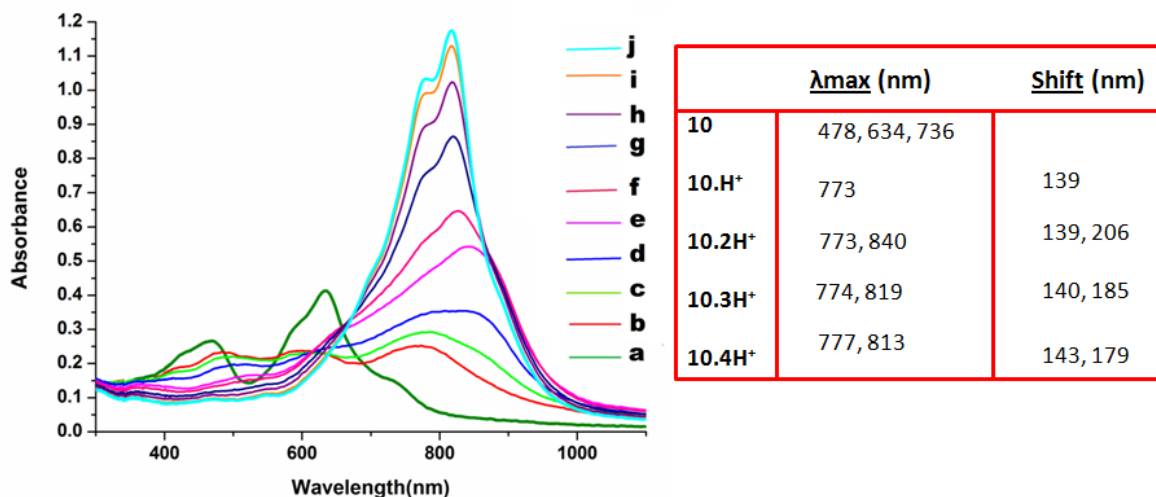

**Figure S22:** Titration with dilute solution of TFA in  $\text{CH}_2\text{Cl}_2$  on decaphyrin **10** with concentration  $1.39 \times 10^{-5}$  M. The concentration of TFA used are a) 0 M, b)  $6.5 \times 10^{-6}$  M, c)  $1.3 \times 10^{-5}$  M, c)  $2.6 \times 10^{-5}$  M, e)  $3.9 \times 10^{-5}$  M, f)  $5.2 \times 10^{-5}$  M, g)  $7.8 \times 10^{-5}$  M, h)  $1.04 \times 10^{-4}$  M, i)  $1.3 \times 10^{-4}$  M and j)  $1.56 \times 10^{-4}$  M

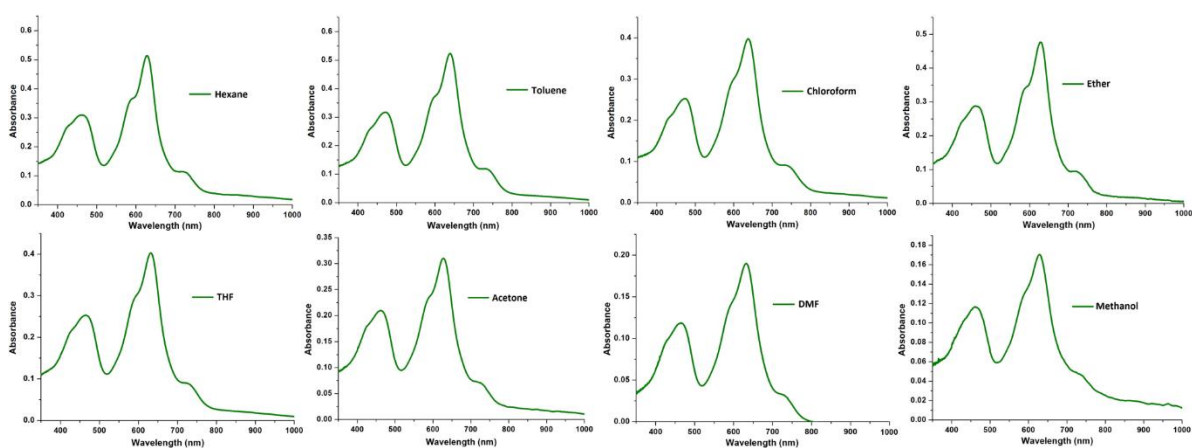

**Figure S23:** Electronic absorption spectra of **10** in various solvents.

## Display Report

**Analysis Info**  
Analysis Name: D:\Data\JAN-2019\TKC\04012019\_TKC\_ARN\_CYANO\_DPM.d  
Method: pos tune\_wide\_030118.m  
Sample Name: Tmix-131118  
Comment:  
Acquisition Date: 1/4/2019 3:14:35 PM  
Operator: Amit S.Sahu  
Instrument: micrOTOF-Q II 10337

### Acquisition Parameter

|             |            |                       |           |                  |           |
|-------------|------------|-----------------------|-----------|------------------|-----------|
| Source Type | ESI        | Ion Polarity          | Positive  | Set Nebulizer    | 0.4 Bar   |
| Focus       | Not active | Set Capillary         | 4500 V    | Set Dry Heater   | 180 °C    |
| Scan Begin  | 50 m/z     | Set End Plate Offset  | -500 V    | Set Dry Gas      | 4.0 l/min |
| Scan End    | 3000 m/z   | Set Collision Cell RF | 650.0 Vpp | Set Divert Valve | Waste     |

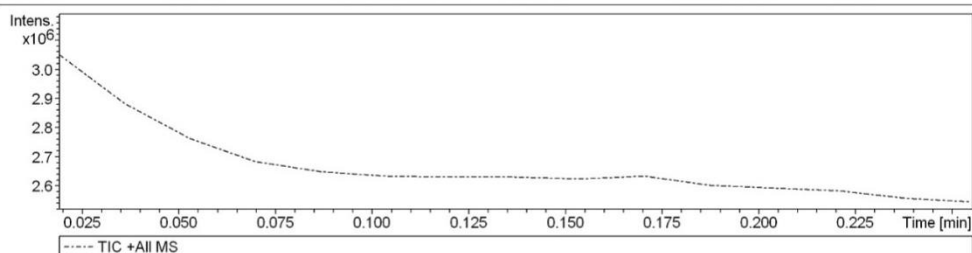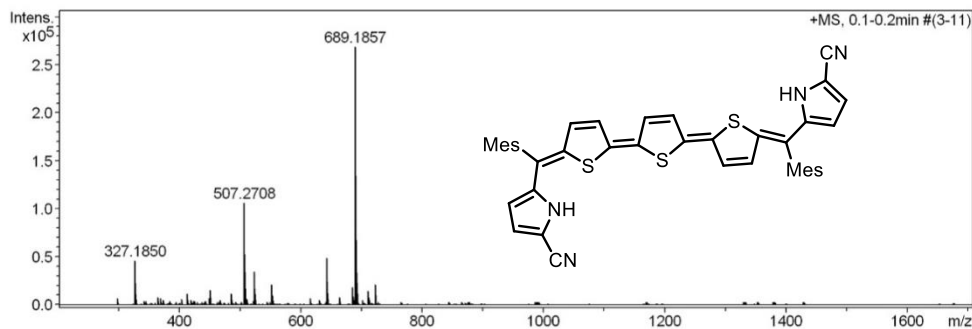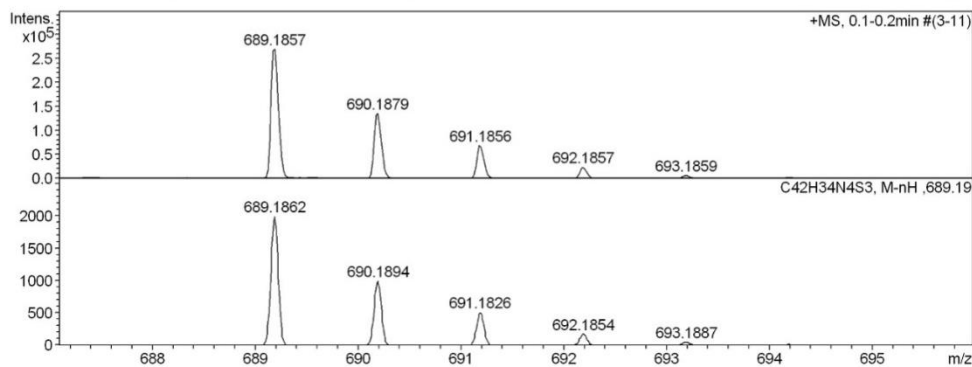

**Figure S24:** HRMS spectrum of **13**.

## Display Report

**Analysis Info**  
Analysis Name D:\Data\FEB-2019\TKC\06022019\_TKC\_ARN\_TER\_DECA\_CC.d Acquisition Date 2/6/2019 10:22:11 AM  
Method pos tune high.m Operator Amit S.Sahu  
Sample Name Instrument micrOTOF-Q II 10337  
Comment

**Acquisition Parameter**

|             |            |                       |            |                  |           |
|-------------|------------|-----------------------|------------|------------------|-----------|
| Source Type | ESI        | Ion Polarity          | Positive   | Set Nebulizer    | 0.4 Bar   |
| Focus       | Not active | Set Capillary         | 4500 V     | Set Dry Heater   | 180 °C    |
| Scan Begin  | 50 m/z     | Set End Plate Offset  | -500 V     | Set Dry Gas      | 4.0 l/min |
| Scan End    | 3000 m/z   | Set Collision Cell RF | 1600.0 Vpp | Set Divert Valve | Waste     |

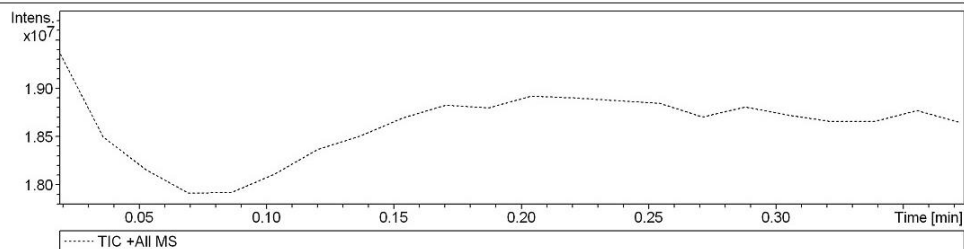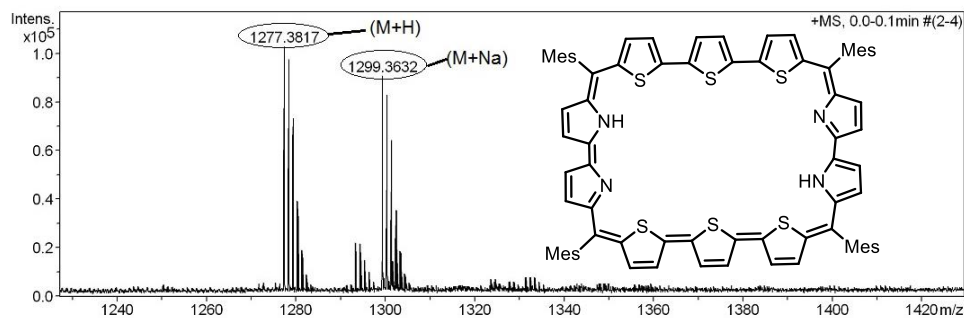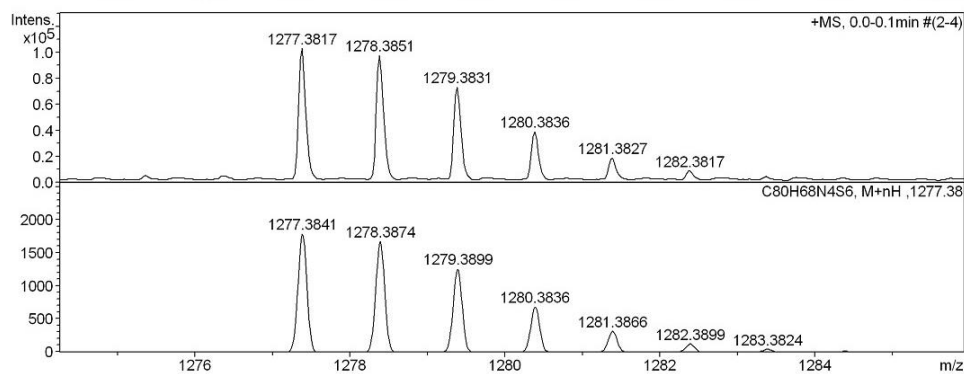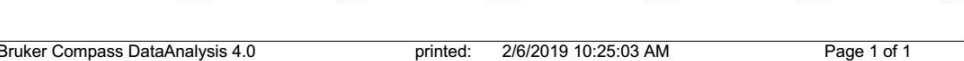

**Figure S25: HRMS spectrum of 12.**

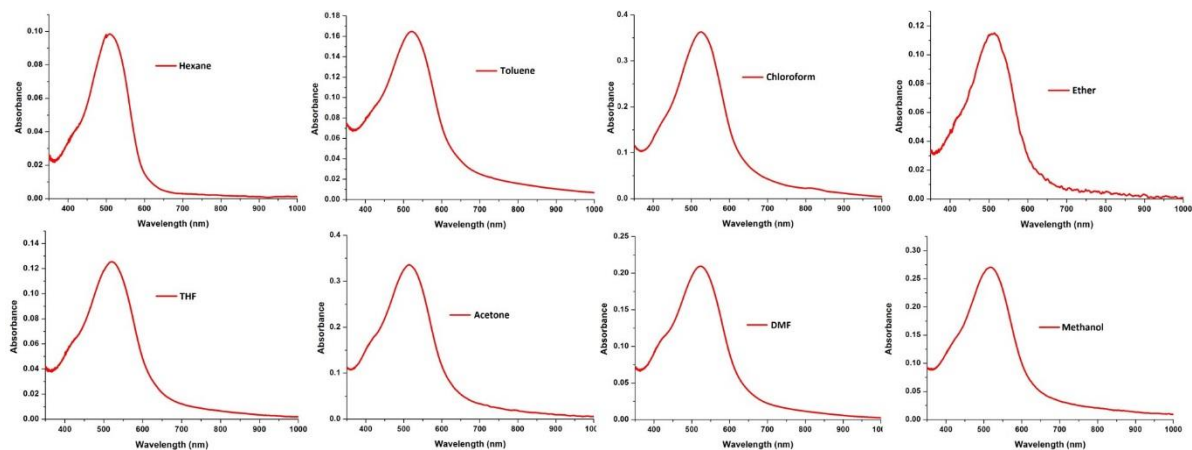

**Figure S26:** Electronic absorption spectra of **12** in various solvents.

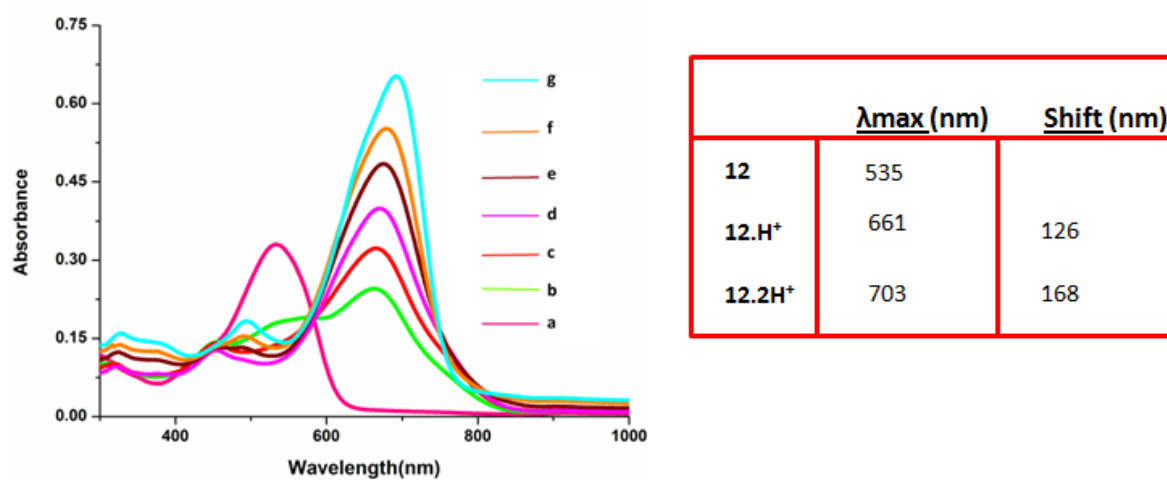

**Figure S27:** Titration with dilute solution of TFA in  $\text{CH}_2\text{Cl}_2$  on decaphyrin **12** with concentration  $7.83 \times 10^{-7}$  M. The concentration of TFA used are a) 0 M, b)  $1.3 \times 10^{-7}$  M, c)  $3.9 \times 10^{-7}$  M, d)  $7.8 \times 10^{-7}$  M, e)  $1.1 \times 10^{-6}$  M, f)  $1.5 \times 10^{-6}$  and g)  $1.9 \times 10^{-6}$  M.



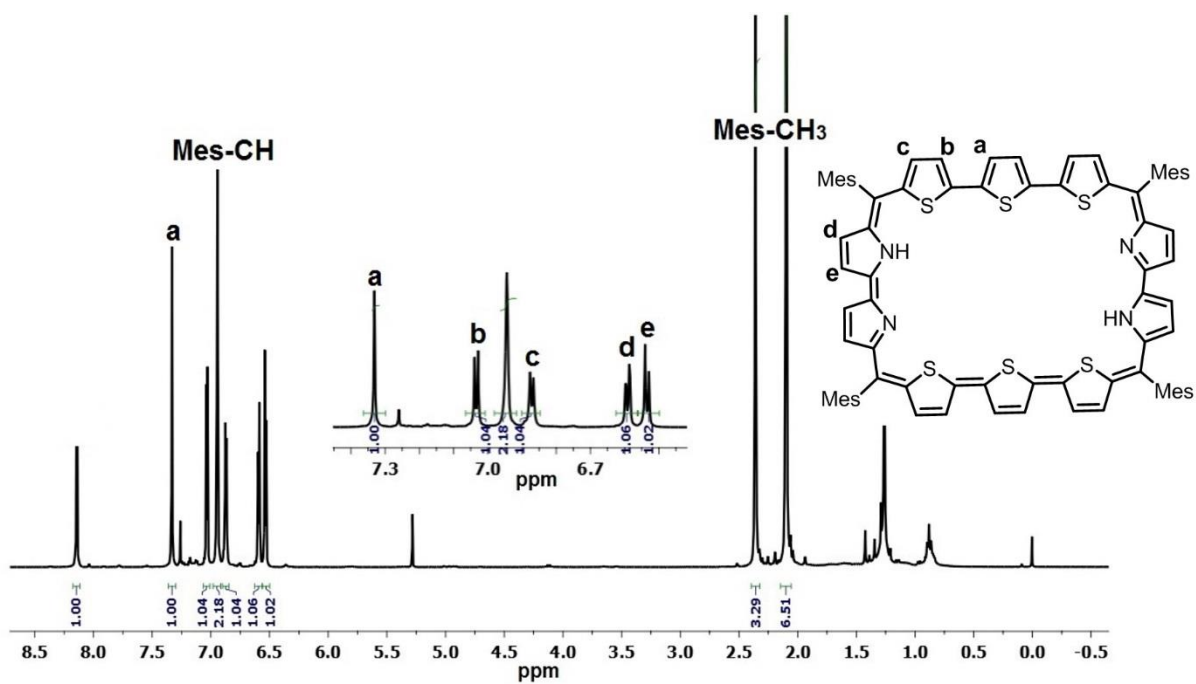

**Figure S29:**  $^1\text{H}$  NMR spectrum of **12** in  $\text{CD}_2\text{Cl}_2$

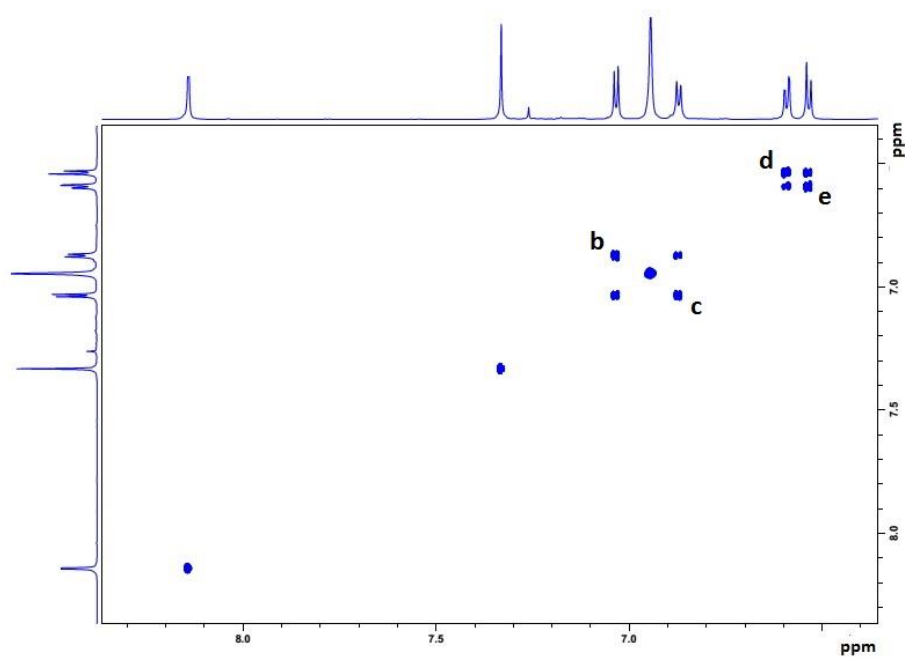

**Figure S30:**  $^1\text{H}$ - $^1\text{H}$  COSY spectrum of **12** with correlation in pyrrole and thiophene rings

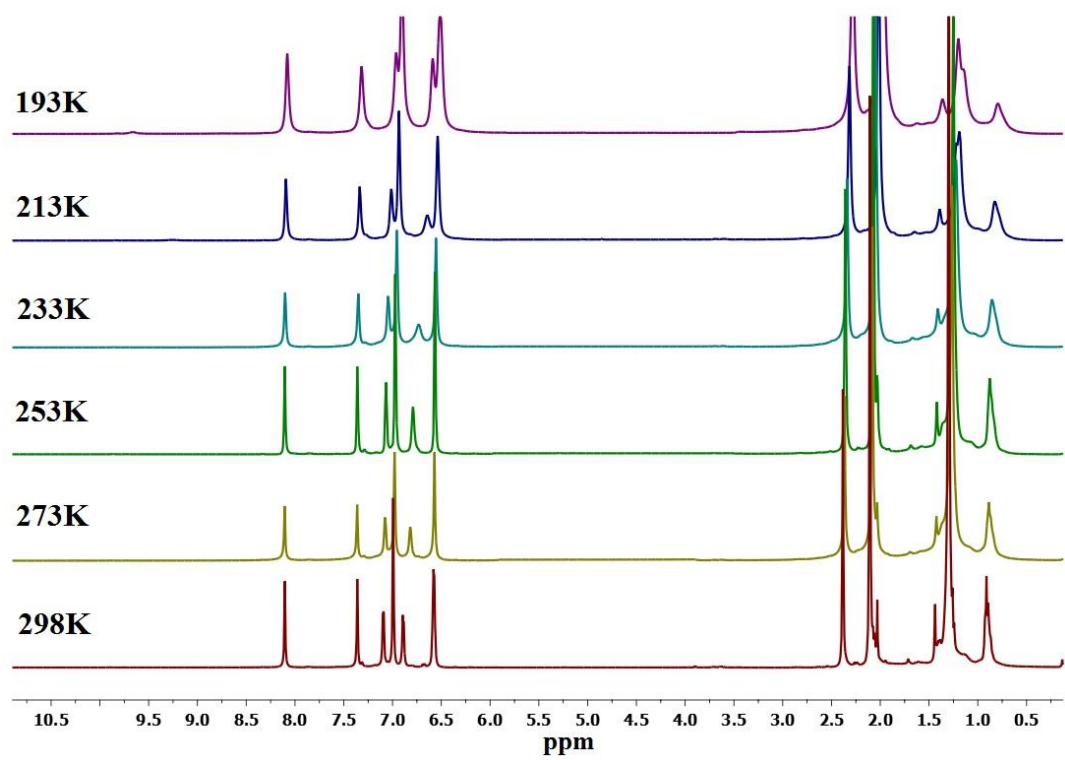

*Figure S31:* Low temperature <sup>1</sup>H NMR spectrum of **12** in CD<sub>2</sub>Cl<sub>2</sub> (Full)

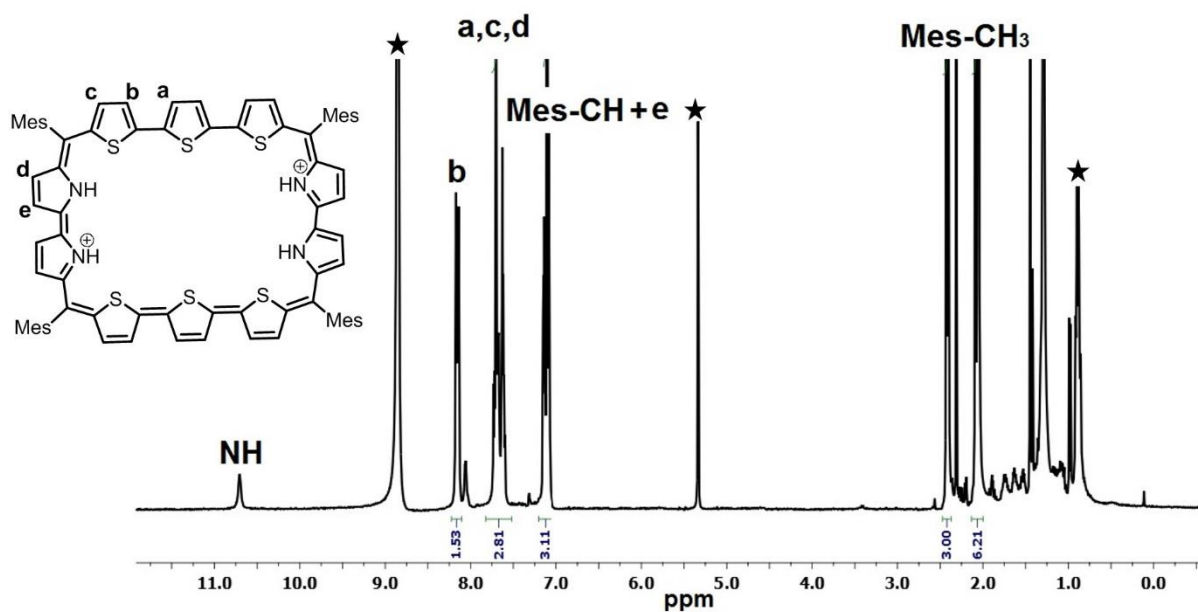

Figure S32:  $^1\text{H}$  NMR spectrum of  $12.2\text{H}^+$  in  $\text{CD}_2\text{Cl}_2$

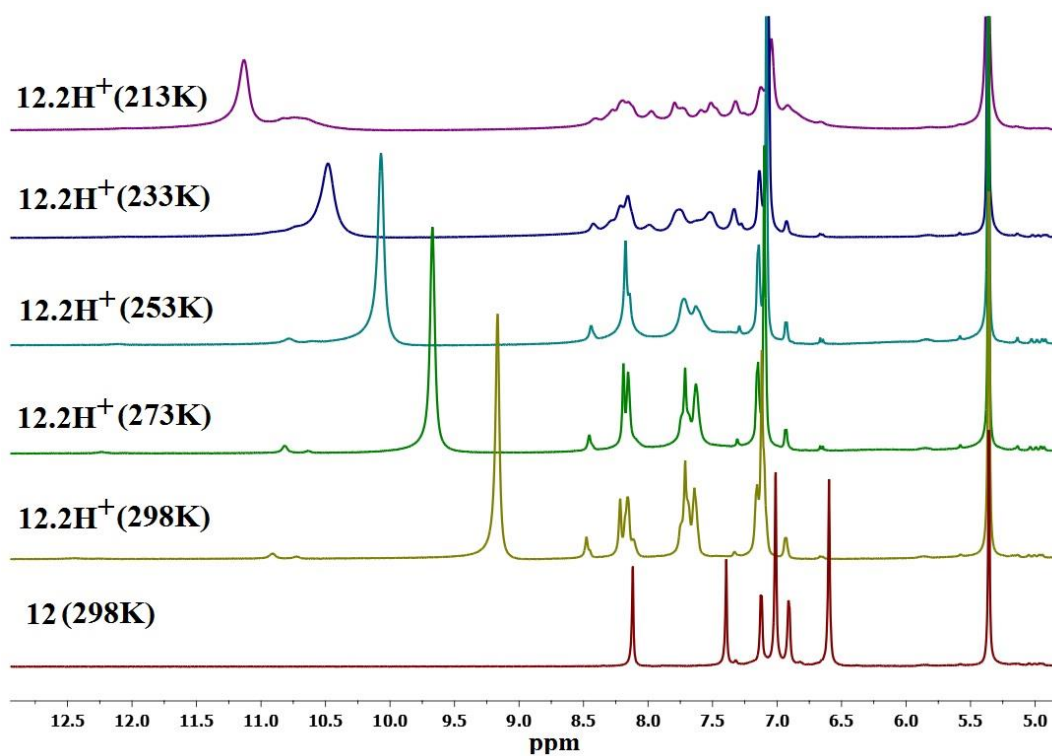

Figure S33: Low temperature  $^1\text{H}$  NMR spectrum of  $12.2\text{H}^+$  in  $\text{CD}_2\text{Cl}_2$  (Full)



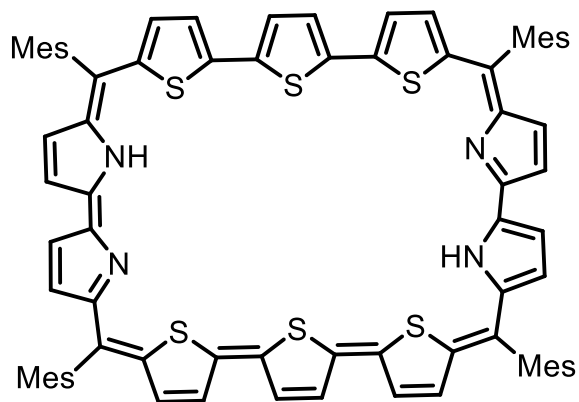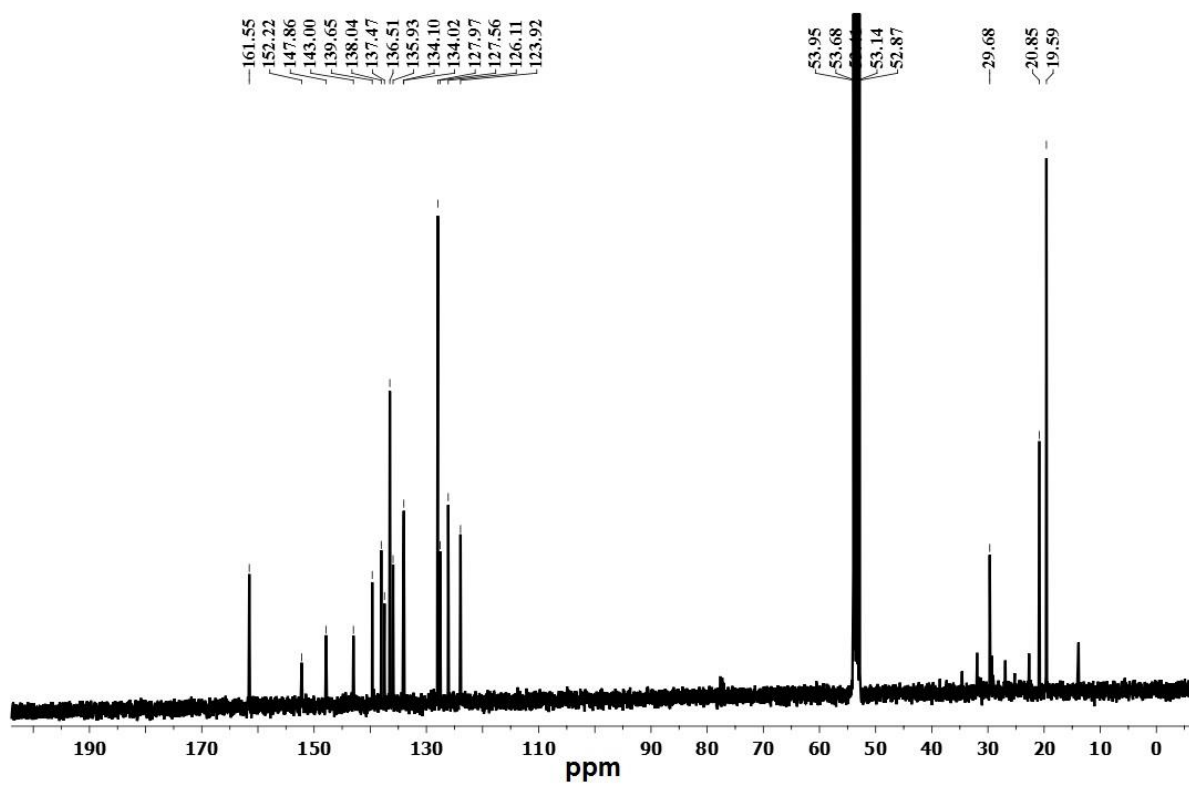

Figure S34: Proton decoupled  $^{13}\text{C}$  NMR spectrum of **12** in  $\text{CD}_2\text{Cl}_2$

a)

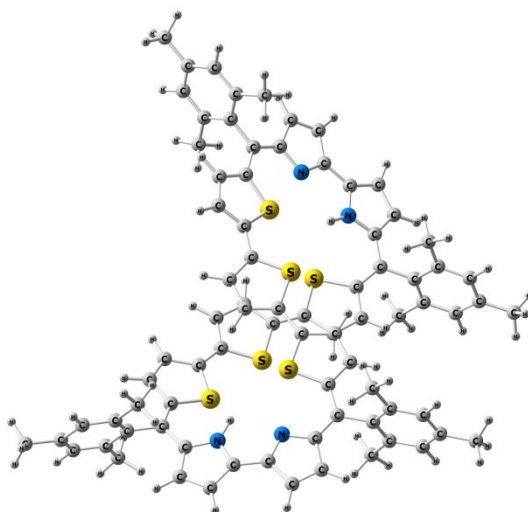

b)

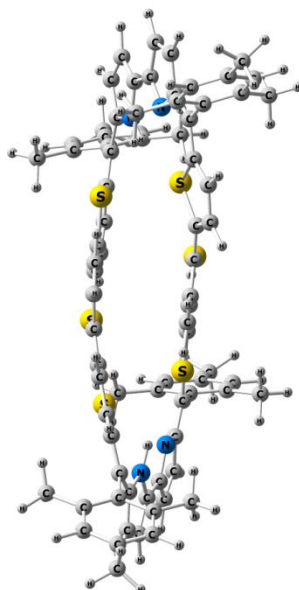

**Figure S35:** (a) Front view (b) side view of the optimized structure of **12** in figure-eight configuration at M062X/6-31G\*\* level of DFT.

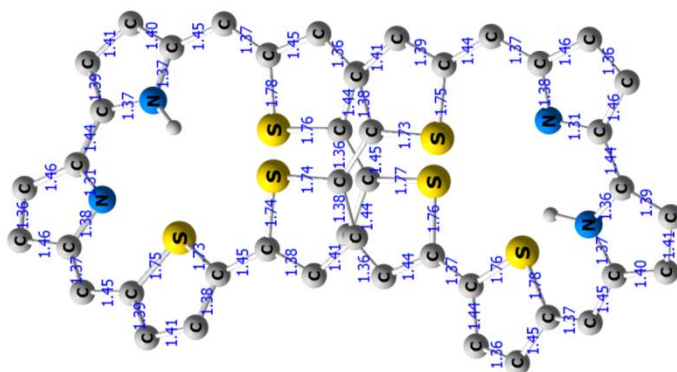

**Figure S36:** Bond length parameters in Å for **12** at M062X/6-31G\*\* level of DFT. Mesityl groups and Hydrogen atoms are omitted for clarity.

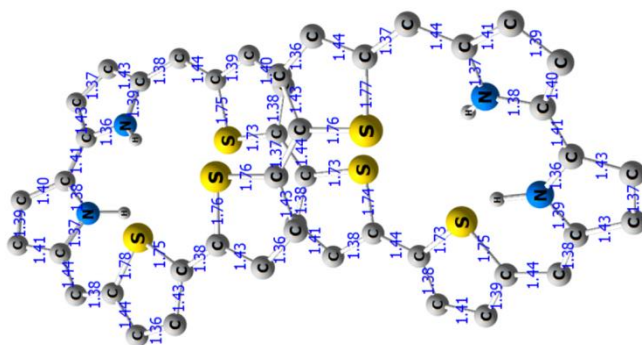

**Figure S37:** Optimized structure of **12.2H<sup>+</sup>** at M062X/6-31G\*\* level of DFT. Bond lengths in Å. Mesityl groups and Hydrogen atoms are omitted for clarity.

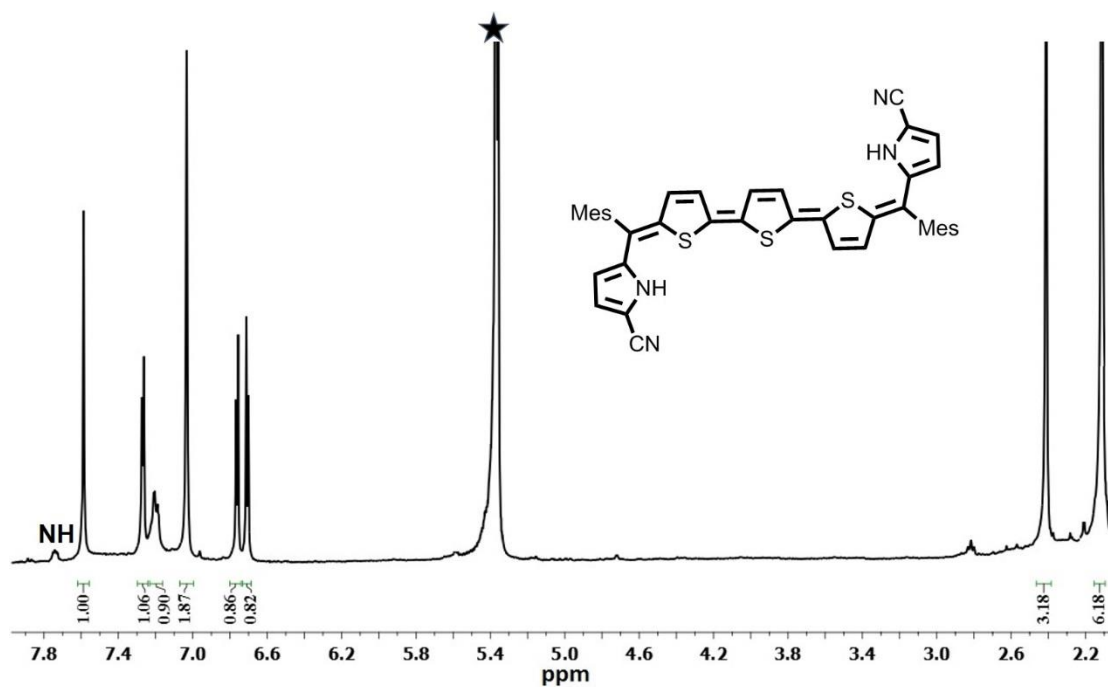

Figure 38:  $^1\text{H}$  NMR spectrum of **13** in  $\text{CD}_2\text{Cl}_2$

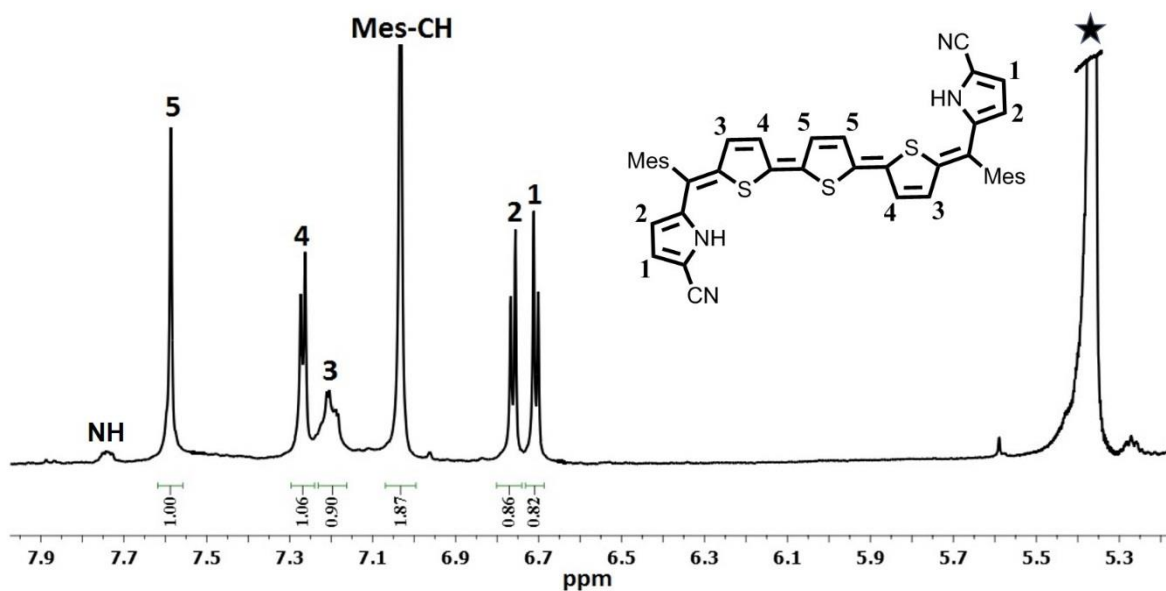

Figure S39:  $^1\text{H}$  NMR spectrum of **13** in  $\text{CD}_2\text{Cl}_2$  (Aromatic region)

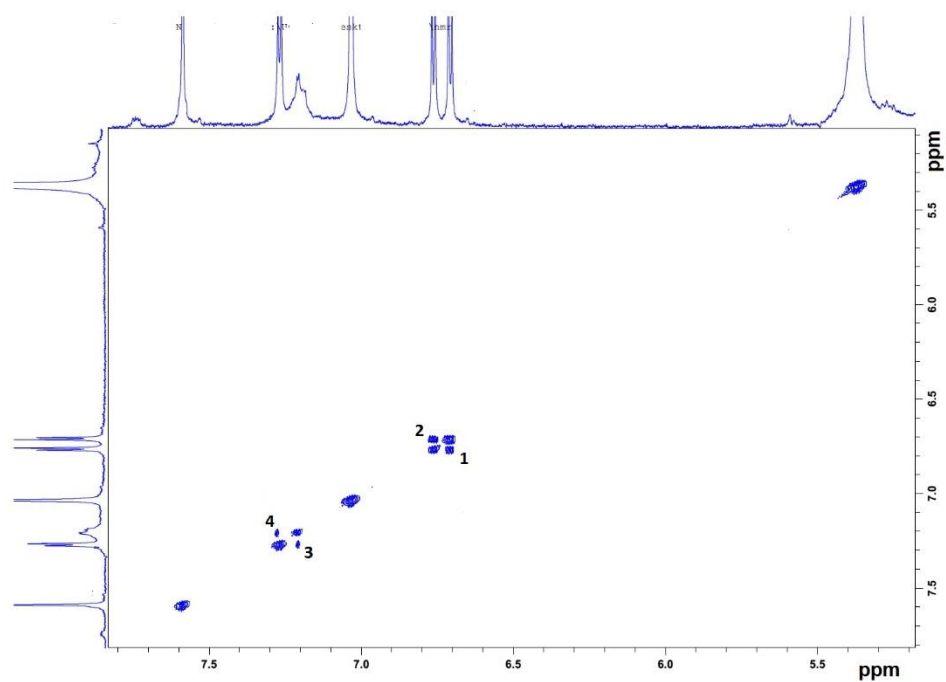

**Figure S40:**  $^1\text{H}$ - $^1\text{H}$  COSY spectrum of **13** with correlation in pyrrole and thiophene rings

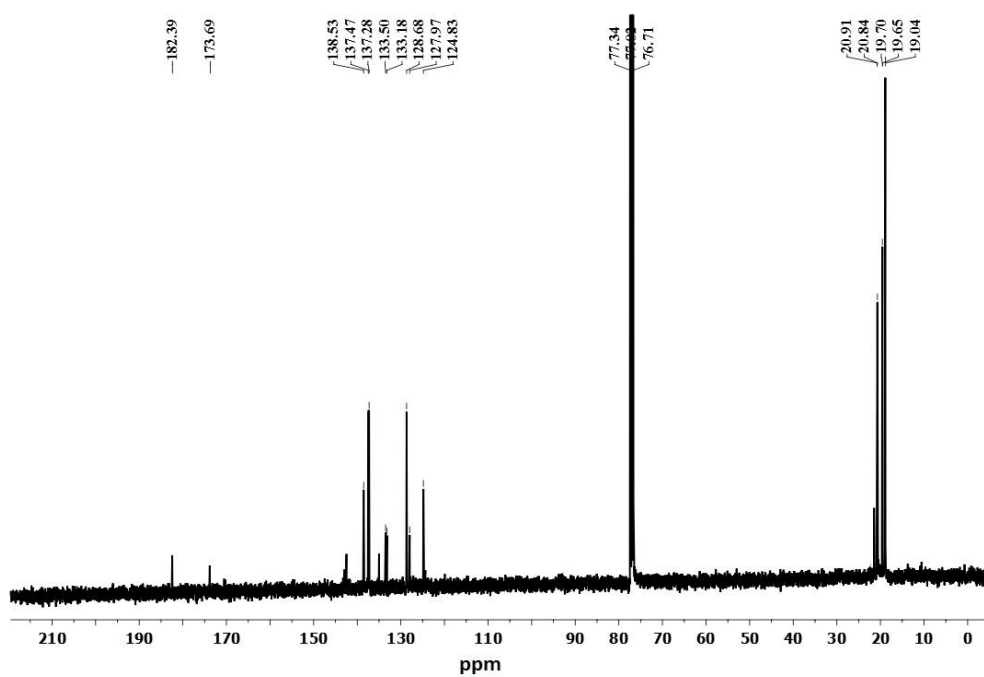

**Figure S41:** Proton decoupled  $^{13}\text{C}$  NMR spectrum of **13** in  $\text{CDCl}_3$

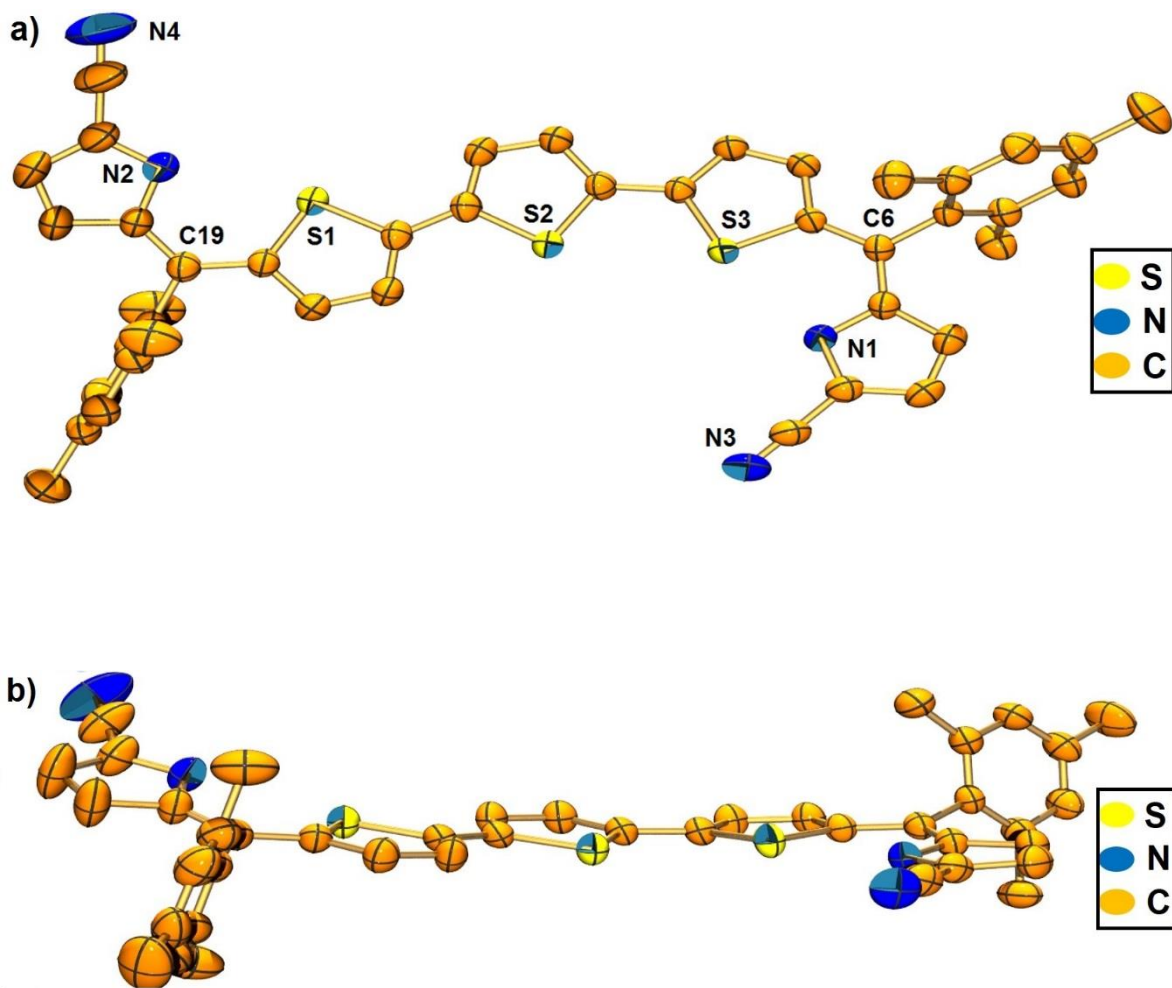

**Figure S42:** Crystal structure of **13** (a) Top view and (b) side view (Hydrogen atoms are omitted for clarity). Thermal ellipsoids are drawn at 50% probability.

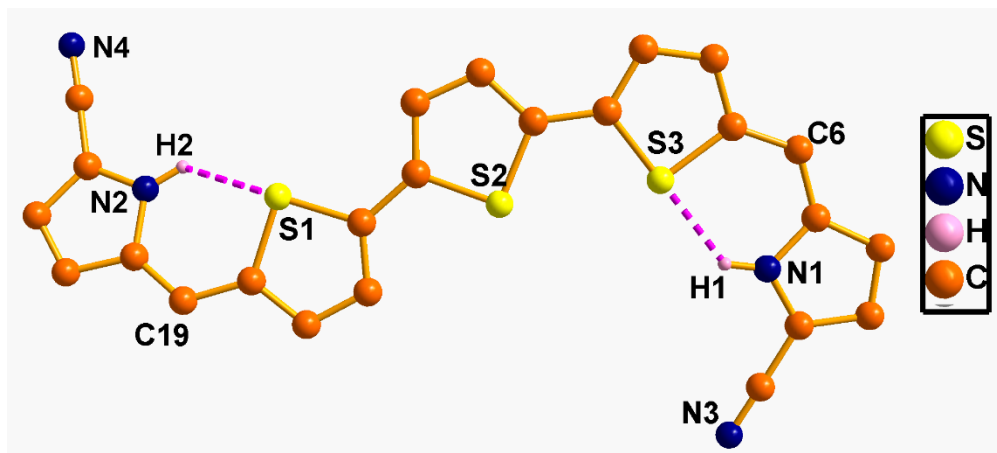

**Figure S43:** Self assembled dimer through intermolecular hydrogen bonding of **13** (C40-H40...N3 with a distance 2.71Å and angle 149.41°)

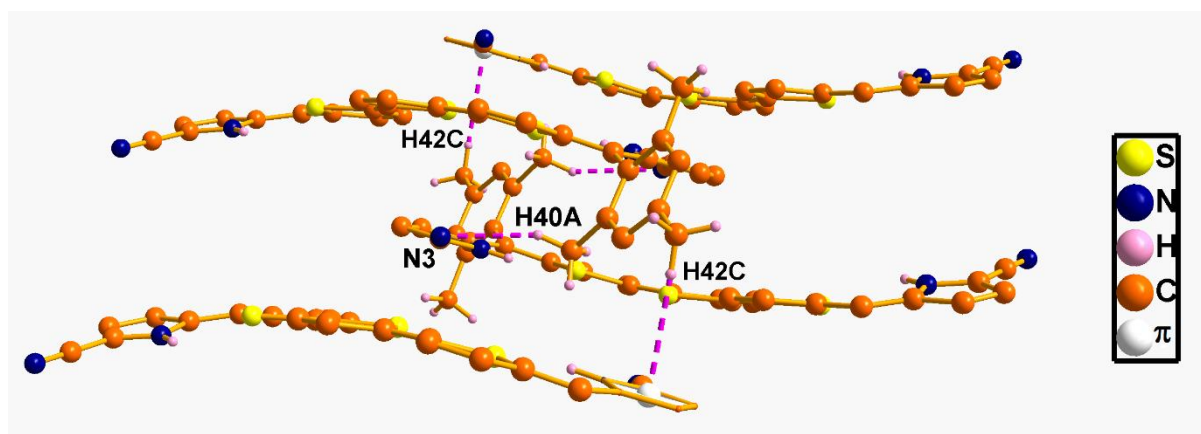

**Figure S44:** Two dimensional array of **13** (a) Intermolecular hydrogen bonding (C40-H40...N3 with a distance 2.71Å and angle 149.41°) (b)  $\pi$ ...H interaction between Py( $\pi$ )...C42-H42C

**Table S2:** Crystal data for 13

| Table 2. Crystal data and structure refinement for TKC_CYANO_TPM. |                                                                     |
|-------------------------------------------------------------------|---------------------------------------------------------------------|
| Identification code                                               | TKC_CYANO_TPM                                                       |
| Empirical formula                                                 | C <sub>28</sub> H <sub>22.67</sub> N <sub>2.67</sub> S <sub>2</sub> |
| Formula weight                                                    | 460.61                                                              |
| Temperature/K                                                     | 293(2)                                                              |
| Crystal system                                                    | triclinic                                                           |
| Space group                                                       | P-1                                                                 |
| a/Å                                                               | 8.69725(17)                                                         |
| b/Å                                                               | 10.9283(2)                                                          |
| c/Å                                                               | 20.5323(5)                                                          |
| $\alpha$ /°                                                       | 84.0758(17)                                                         |
| $\beta$ /°                                                        | 88.6243(18)                                                         |
| $\gamma$ /°                                                       | 67.6514(18)                                                         |
| Volume/Å <sup>3</sup>                                             | 1795.05(7)                                                          |
| Z                                                                 | 3                                                                   |
| $\rho_{\text{calc}}$ /cm <sup>3</sup>                             | 1.278                                                               |
| $\mu$ /mm <sup>-1</sup>                                           | 2.162                                                               |
| F(000)                                                            | 724.0                                                               |
| Crystal size/mm <sup>3</sup>                                      | 0.18 × 0.16 × 0.14                                                  |
| Radiation                                                         | CuK $\alpha$ ( $\lambda$ = 1.54184)                                 |
| 2 $\theta$ range for data collection/°                            | 8.66 to 136.49                                                      |
| Index ranges                                                      | -10 ≤ h ≤ 10, -10 ≤ k ≤ 13, -24 ≤ l ≤ 24                            |
| Reflections collected                                             | 25727                                                               |
| Independent reflections                                           | 6570 [R <sub>int</sub> = 0.0934, R <sub>sigma</sub> = 0.0607]       |
| Data/restraints/parameters                                        | 6570/0/448                                                          |
| Goodness-of-fit on F <sup>2</sup>                                 | 1.092                                                               |
| Final R indexes [ $I \geq 2\sigma(I)$ ]                           | R <sub>1</sub> = 0.0779, wR <sub>2</sub> = 0.2323                   |
| Final R indexes [all data]                                        | R <sub>1</sub> = 0.0852, wR <sub>2</sub> = 0.2367                   |
| Largest diff. peak/hole / e Å <sup>-3</sup>                       | 0.59/-0.53                                                          |
